# Supplementary material
Source: MDPI journal article supplement (https://www.mdpi.com/2073-4441/10/10/1423)
Supplement: s1 [file s1]

# Supplementary Materials: Rapidly Pulsed Pumping Accelerates Remediation in A Vertical Circulation Well Model

David M. Kahler

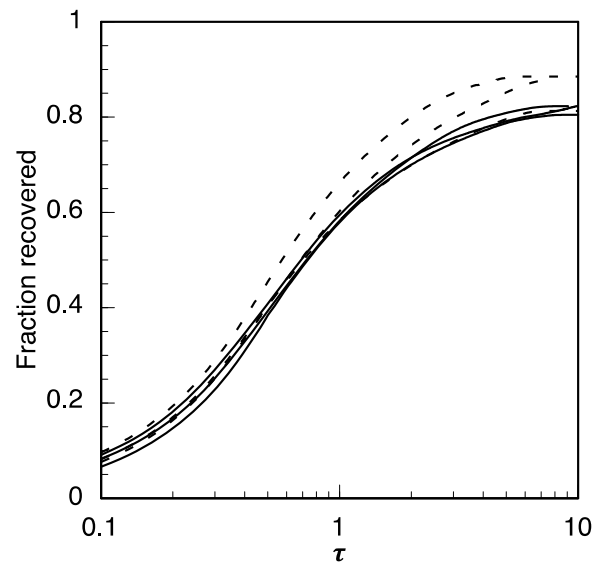

**Figure S1.** The recovery for each trial, three under steady flow (solid) and three under pulsed flow (dashed).

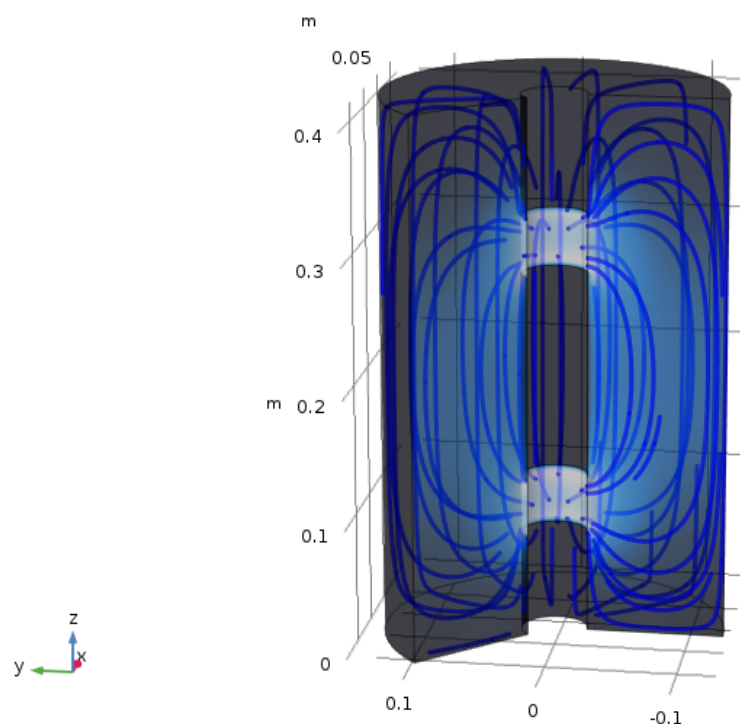

**Figure S2.** The dipole flow shown by streamlines and velocity for the CFD simulation of the simulated physical VCW tank,  $r = 0.129$  m. Color scale is velocity in m/s and the grid is labeled in m. This alternative color scale is best viewed on a computer monitor.

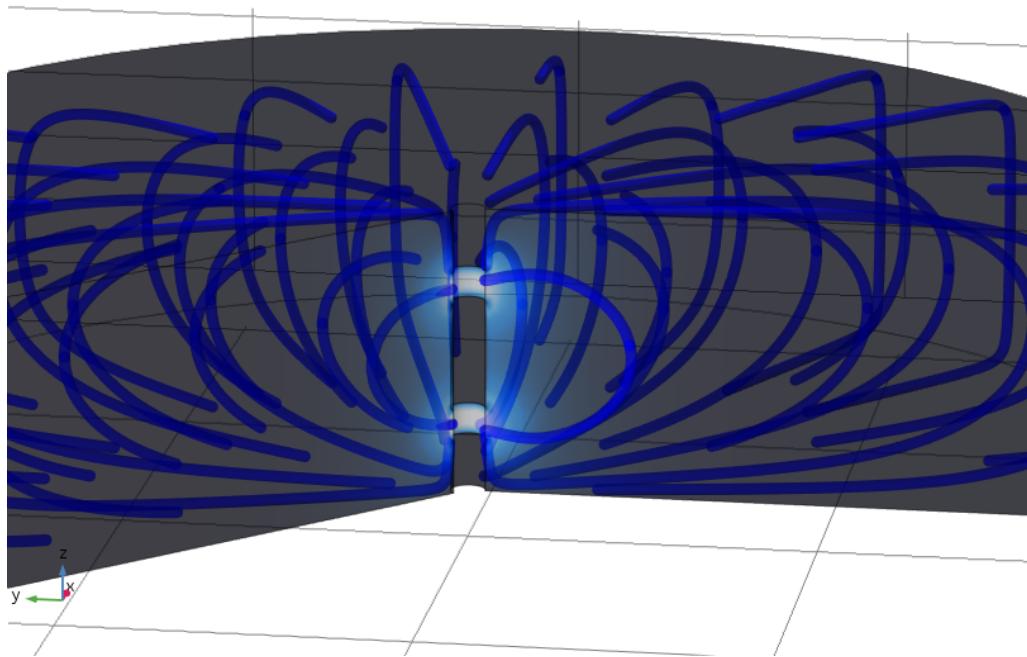

**Figure S3.** The dipole flow shown by streamlines and velocity for the CFD simulation of the large-domain VCW,  $r = 1.000$  m. Color scale is velocity in m/s and the grid is labeled in m. This alternative color scale is best viewed on a computer monitor.

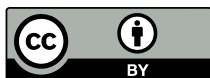

© 2018 by the authors. Licensee MDPI, Basel, Switzerland. This article is an open access article distributed under the terms and conditions of the Creative Commons Attribution (CC BY) license (<http://creativecommons.org/licenses/by/4.0/>).
